# Supplementary material for: Deep Eutectic Liquids as a Topical Vehicle for Tadalafil: Characterisation and Potential Wound Healing and Antimicrobial Activity
Source: MDPI journal article supplement (doi:10.3390/molecules28052402), 2023-03-06

# **Deep Eutectic liquids as a Topical Vehicle of Tadalafil: Characterization and Potential Wound Healing and Antimicrobial Activity**

Bayan Alkhawaja<sup>1</sup>, Faisal Al-Akayleh<sup>2\*</sup>, Ashraf Al-Khateeb<sup>2</sup>, Jehad Nasiraldeen<sup>3</sup>, Bayan Y. Ghanim<sup>4</sup>, Albert Bolhuis<sup>5</sup>, Nisreen Jaber<sup>6</sup>, Mayyas Al-Remawi<sup>2</sup>, Nidal A. Qinna<sup>4</sup>

<sup>1</sup>Department of Pharmaceutical Medicinal Chemistry and Pharmacognosy, Faculty of Pharmacy and Medical Sciences, University of Petra, Amman 11196, Jordan

<sup>2</sup>Department of Pharmaceutics and Pharmaceutical Technology, Faculty of Pharmacy and Medical Sciences, Petra University, Amman 11196, Jordan

<sup>3</sup>Department of Pharmaceutical Sciences, Faculty of Pharmacy, Zarqa University, Zarqa 13110, Jordan

<sup>4</sup> University of Petra Pharmaceutical Center, Faculty of Pharmacy and Medical Sciences, Petra University, Amman 11196, Jordan

<sup>5</sup>Department of Life Sciences, University of Bath, Claverton Down, BA2 7AY, Bath, UK

<sup>6</sup> Faculty of Pharmacy, Al-Zaytoonah University of Jordan, Amman 11733, Jordan

\*Corresponding author's email: [falakayleh@uop.edu.jo](mailto:falakayleh@uop.edu.jo) (F. Al-Akayleh)

University of Petra, Amman 11196, Jordan

**Supplementary results**

1- Linearity of the HPLC method utilized for the analysis of TDF and LDC

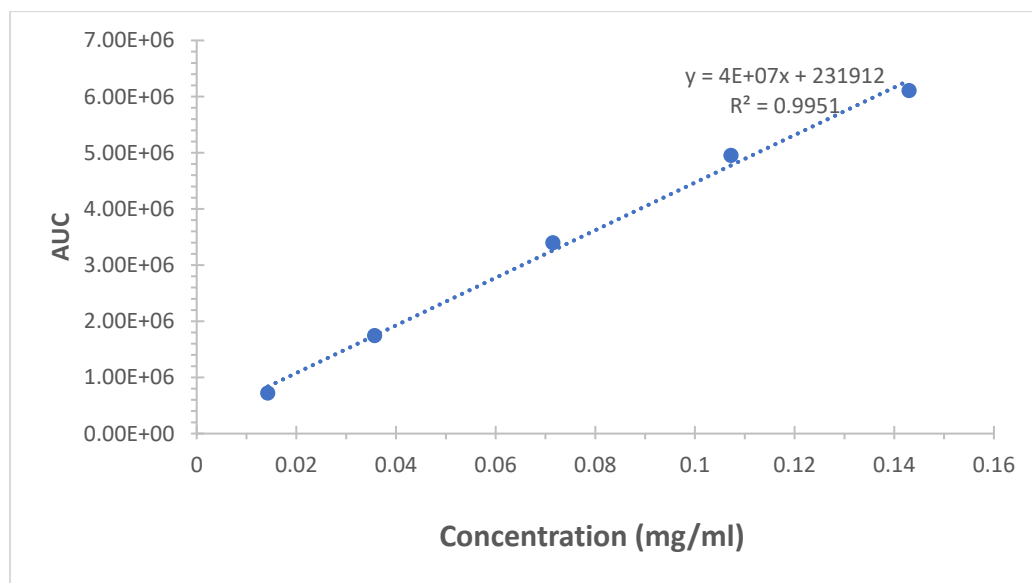

**Figure S1.** Standard curve of TDF.

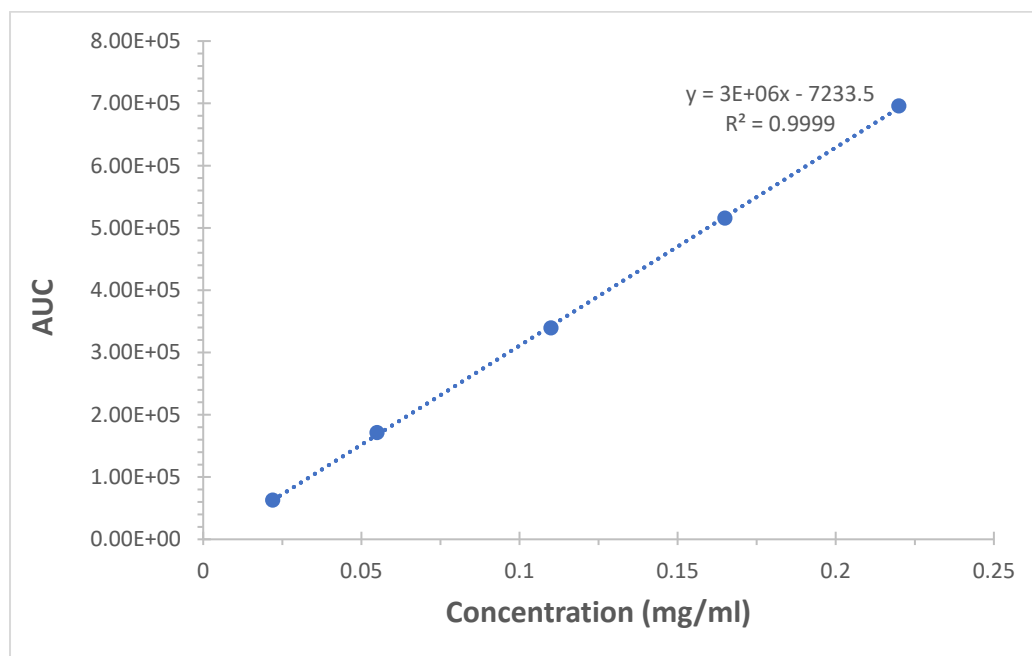

**Figure S2.** Standard curve of LDC.

2- NMR of the individual components

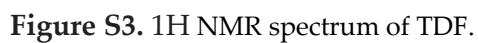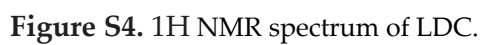

Supplement: s1 [file s1]
